# Supplementary material
Source: Springer Nature journal article supplement (https://www.springermedizin.de/resource/supplementary/12884_2014_1212_MOESM5_ESM.pdf/9459184)

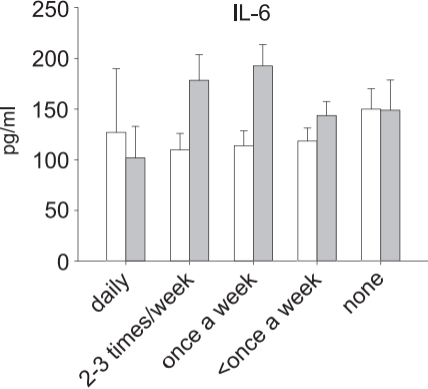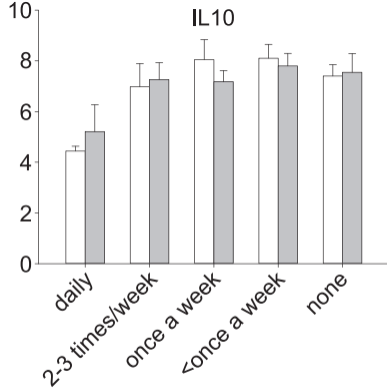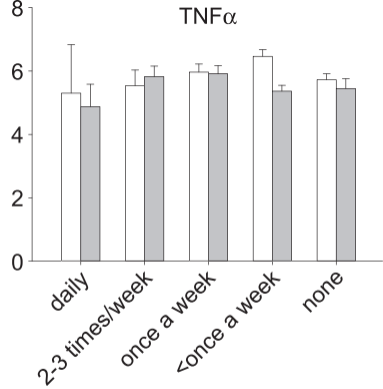

Chinese Australian

Supplement: MOESM5 [file 9459184]
